# Supplementary material
Source: PubMed Central journal article supplement (PMC5511565)
Supplement: NIHMS849336-supplement-7.pdf [file NIHMS849336-supplement-7.pdf]

Supplementary Table S1: Clinicopathologic information and sequencing statistics of the 38 metastatic breast cancers included in the study.

| Sample ID | Diagnosis*                          | Matrix producing | Predominant Cellular Type** | Histologic grade*** | ER | PR | HER2 | Triple-negative phenotype**** | Age at diagnosis | Tumor size (cm) | pT stage | pN stage | M stage | Follow-up time | Survival | DCIS    | Extensive DCIS | Tubule formation | Nuclear grade | Mitotic Count (pT10g) | Necrosis (% tumor) | Necrosis (%) | Borders      | Lymphovascular invasion | Stromal TILs (%) | Chondroid component (%) | Osteoid component (%) | Squamous component (%) | Epithelioid component (%) | Rhabdoid component (%) | RNA available for Wnt1 signaling pathway RT-PCR array | RNA available for PI3K/AKT signaling pathway RT-PCR array | Sequencing instrument | Sequencing type | Protein FFPE | Number of reads (tumor) | Mean target coverage (tumor) | % target bases covered at 20x (tumor) | % target bases covered at 50x (tumor) | % target bases covered at 100x (tumor) | Number of reads (normal) | Mean target coverage (normal) | % target bases covered at 20x (normal) | % target bases covered at 50x (normal) | % target bases covered at 100x (normal) |             |        |        |        |        |
|-----------|-------------------------------------|------------------|-----------------------------|---------------------|----|----|------|-------------------------------|------------------|-----------------|----------|----------|---------|----------------|----------|---------|----------------|------------------|---------------|-----------------------|--------------------|--------------|--------------|-------------------------|------------------|-------------------------|-----------------------|------------------------|---------------------------|------------------------|-------------------------------------------------------|-----------------------------------------------------------|-----------------------|-----------------|--------------|-------------------------|------------------------------|---------------------------------------|---------------------------------------|----------------------------------------|--------------------------|-------------------------------|----------------------------------------|----------------------------------------|-----------------------------------------|-------------|--------|--------|--------|--------|
| MTY31     | Carcinoma with mesenchymal elements | Yes              | Chondroid                   | 2                   | -  | -  | -    | Yes                           | 59               | 1.2             | T1c      | N0       | MO      | 208.99         | LIVING   | Absent  | No             | 2                | 3             | 2.139                 | Present            | 20           | Mixed        | none                    | 6                | 80                      | 0                     | 0                      | 0                         | 20                     | 0                                                     | No                                                        | Yes                   | HiSeq           | 7876         | Fusion                  | 77,823,718                   | 82                                    | 79.33%                                | 48.81%                                 | 16.44%                   | 124,825,237                   | 101                                    | 88.41%                                 | 68.92%                                  | 30.21%      |        |        |        |        |
| MTY33     | Carcinoma with mesenchymal elements | No               | Chondroid                   | 3                   | -  | -  | -    | Yes                           | 44               | 6.2             | T2b      | N0       | MO      | 43.91          | DECEASED | NA      | NA             | NA               | NA            | NA                    | NA                 | NA           | NA           | NA                      | NA               | NA                      | NA                    | NA                     | NA                        | NA                     | NA                                                    | Yes                                                       | HiSeq                 | 7876            | Fusion       | 69,003,841              | 48                           | 73.26%                                | 38.62%                                | 9.30%                                  | 121,613,921              | 51                            | 74.05%                                 | 59.35%                                 | 19.86%                                  |             |        |        |        |        |
| MTY39     | Carcinoma with mesenchymal elements | No               | Fibrotic                    | 3                   | -  | -  | -    | Yes                           | 48               | 6.4             | T2b      | N0       | MO      | 109.32         | LIVING   | Absent  | No             | 3                | 3             | 3.192                 | Present            | 50           | Papillary    | none                    | 0                | 10                      | 85                    | 20                     | 0                         | 0                      | 0                                                     | 0                                                         | 0                     | Yes             | HiSeq        | 7876                    | Fusion                       | 68,112,838                            | 78                                    | 81.68%                                 | 47.47%                   | 20.82%                        | 124,688,951                            | 73                                     | 81.65%                                  | 68.95%      | 24.29% |        |        |        |
| MTY42     | Carcinoma with squamous metaplasia  | No               | Squamous                    | 3                   | -  | -  | -    | Yes                           | 48               | 3.1             | T2       | N0       | MO      | 102.82         | LIVING   | Present | No             | 3                | 3             | 3.144                 | Present            | 1            | Infiltrating | none                    | 0                | 0                       | 0                     | 0                      | 0                         | 0                      | 0                                                     | 0                                                         | 0                     | Yes             | HiSeq        | 7876                    | Fusion                       | 74,479,502                            | 68                                    | 78.07%                                 | 42.89%                   | 14.92%                        | 121,718,764                            | 69                                     | 79.46%                                  | 61.78%      | 19.24% |        |        |        |
| MTY45     | Carcinoma with mesenchymal elements | Yes              | Chondroid                   | 3                   | -  | -  | -    | Yes                           | 56               | 3.3             | T2       | N0       | MO      | 133.18         | DECEASED | Absent  | No             | 3                | 3             | 3.160                 | Present            | 20           | Papillary    | none                    | 0                | 0                       | 0                     | 0                      | 0                         | 0                      | 0                                                     | 0                                                         | 0                     | Yes             | HiSeq        | 7876                    | Fusion                       | 66,365,747                            | 56                                    | 73.44%                                 | 38.75%                   | 13.70%                        | 119,433,911                            | 67                                     | 81.43%                                  | 61.44%      | 30.30% |        |        |        |
| MTY45     | Carcinoma with mesenchymal elements | Yes              | Chondroid                   | 3                   | -  | -  | -    | Yes                           | 56               | 9               | T2       | N1b      | MO      | 146.71         | DECEASED | Absent  | No             | 3                | 3             | 3.131                 | Present            | 0            | Mixed        | none                    | 5                | 90                      | 0                     | 0                      | 0                         | 0                      | 0                                                     | 0                                                         | 0                     | Yes             | HiSeq        | 7876                    | Fusion                       | 68,818,227                            | 51                                    | 74.88%                                 | 38.41%                   | 12.01%                        | 109,172,460                            | 70                                     | 81.46%                                  | 68.81%      | 24.82% |        |        |        |
| MTY49     | Carcinoma with mesenchymal elements | No               | Fibrotic                    | 3                   | -  | -  | -    | Yes                           | 56               | 2.3             | T2       | N0       | MO      | 58.36          | DECEASED | Absent  | No             | 3                | 3             | 3.122                 | Present            | 0            | Mixed        | none                    | 0                | 0                       | 0                     | 0                      | 0                         | 0                      | 0                                                     | 0                                                         | 0                     | Yes             | HiSeq        | 7876                    | Fusion                       | 74,100,567                            | 64                                    | 80.13%                                 | 47.03%                   | 16.62%                        | 119,482,550                            | 67                                     | 82.4%                                   | 61.93%      | 30.30% |        |        |        |
| MTY61     | Spindle cell carcinoma              | No               | Fibrotic                    | 2                   | -  | -  | -    | Yes                           | 51               | 1.8             | T1c      | N1b      | MO      | 139.50         | LIVING   | Absent  | No             | 3                | 2             | 2.142                 | Present            | 10           | Infiltrating | none                    | 0                | 0                       | 0                     | 0                      | 0                         | 0                      | 0                                                     | 0                                                         | 0                     | Yes             | HiSeq        | 7876                    | Fusion                       | 78,987,846                            | 43                                    | 79.11%                                 | 49.77%                   | 17.76%                        | 88,368,308                             | 70                                     | 80.15%                                  | 58.31%      | 22.92% |        |        |        |
| MTY61     | Carcinoma with mesenchymal elements | Yes              | Chondroid                   | 3                   | -  | -  | -    | Yes                           | 51               | 2.2             | T2       | N0       | MO      | 49.88          | LIVING   | Present | No             | 3                | 3             | 3.225                 | Present            | 20           | Infiltrating | none                    | 0                | 0                       | 0                     | 0                      | 0                         | 0                      | 0                                                     | 0                                                         | 0                     | Yes             | HiSeq        | 2000                    | 151x101                      | FFPE                                  | 117,083,230                           | 105                                    | 92.05%                   | 60.84%                        | 87.97%                                 | 144,521,107                            | 126                                     | 86.77%      | 78.89% | 55.61% |        |        |
| MTY61     | Carcinoma with squamous metaplasia  | No               | Squamous                    | 3                   | -  | -  | -    | Yes                           | 37               | 2.2             | T2       | N0       | MO      | 68.94          | LIVING   | Present | No             | 3                | 3             | 3.111                 | Present            | 40           | Infiltrating | irregular               | 40               | 6                       | 10                    | 85                     | 0                         | 0                      | 0                                                     | 0                                                         | 0                     | Yes             | HiSeq        | 2000                    | 151x101                      | FFPE                                  | 109,059,404                           | 106                                    | 91.36%                   | 60.24%                        | 89.92%                                 | 149,024,904                            | 119                                     | 89.24%      | 74.11% | 59.61% |        |        |
| MTY67     | Spindle cell carcinoma              | No               | Fibrotic                    | 3                   | -  | -  | -    | Yes                           | 64               | 1.4             | T1b      | N1a      | MO      | 41.25          | DECEASED | Present | No             | 3                | 2             | 3.222                 | Present            | 60           | Infiltrating | none                    | 15               | 0                       | 0                     | 0                      | 0                         | 0                      | 0                                                     | 0                                                         | 0                     | 0               | Yes          | HiSeq                   | 2000                         | 151x101                               | FFPE                                  | 144,759,205                            | 209                      | 91.84%                        | 60.42%                                 | 87.70%                                 | 144,202,047                             | 120         | 88.87% | 76.30% | 47.26% |        |
| MTY67     | Carcinoma with mesenchymal elements | Yes              | Chondroid                   | 3                   | -  | -  | -    | Yes                           | 52               | 1.1             | T1c      | N0       | MO      | 49.81          | LIVING   | Present | No             | 3                | 3             | 3.169                 | Present            | 0            | Infiltrating | irregular               | 40               | 0                       | 0                     | 0                      | 0                         | 0                      | 0                                                     | 0                                                         | 0                     | 0               | Yes          | HiSeq                   | 2000                         | 151x101                               | FFPE                                  | 113,824,660                            | 44                       | 81.14%                        | 48.97%                                 | 12.82%                                 | 117,034,641                             | 120         | 83.82% | 74.18% | 48.36% |        |
| MTY67     | Carcinoma with mesenchymal elements | Yes              | Chondroid                   | 3                   | -  | -  | -    | Yes                           | 52               | 1.8             | T1c      | N0       | MO      | 49.87          | LIVING   | Present | No             | 3                | 3             | 3.180                 | Present            | 10           | Mixed        | none                    | 0                | 0                       | 0                     | 0                      | 0                         | 0                      | 0                                                     | 0                                                         | 0                     | 0               | Yes          | HiSeq                   | 2000                         | 151x101                               | FFPE                                  | 116,424,100                            | 406                      | 91.10%                        | 60.21%                                 | 86.26%                                 | 144,184,176                             | 127         | 88.03% | 78.81% | 52.06% |        |
| MTY67     | Spindle cell carcinoma              | No               | Fibrotic                    | 3                   | -  | -  | -    | Yes                           | 52               | 2.8             | T2       | N0       | MO      | 61.30          | LIVING   | Present | No             | 3                | 3             | 3.201                 | Present            | 10           | Mixed        | none                    | 5                | 0                       | 0                     | 0                      | 0                         | 0                      | 0                                                     | 0                                                         | 0                     | 0               | Yes          | HiSeq                   | 2000                         | 151x101                               | FFPE                                  | 118,958,719                            | 84                       | 92.37%                        | 60.32%                                 | 86.30%                                 | 149,000,670                             | 147         | 90.03% | 78.81% | 52.06% |        |
| MTY67     | Carcinoma with mesenchymal elements | Yes              | Chondroid                   | 3                   | -  | -  | -    | Yes                           | 51               | 2.5             | T2b      | N0       | MO      | 58.41          | DECEASED | Absent  | No             | 2                | 3             | 3.117                 | Present            | 10           | Infiltrating | none                    | 0                | 0                       | 0                     | 0                      | 0                         | 0                      | 0                                                     | 0                                                         | 0                     | Yes             | HiSeq        | 2000                    | 151x101                      | FFPE                                  | 131,409,889                           | 424                                    | 89.02%                   | 60.70%                        | 79.11%                                 | 129,180,884                            | 70                                      | 81.10%      | 69.42% | 26.32% |        |        |
| MTY68     | Spindle cell carcinoma              | No               | Fibrotic                    | 3                   | -  | -  | -    | Yes                           | 49               | 1.8             | T2       | N0       | MO      | 121.33         | DECEASED | Present | No             | 3                | 3             | 3.044                 | Present            | 0            | Mixed        | none                    | 0                | 0                       | 0                     | 0                      | 0                         | 0                      | 0                                                     | 0                                                         | 0                     | 0               | Yes          | HiSeq                   | 2000                         | 151x101                               | FFPE                                  | 146,294,892                            | 436                      | 90.65%                        | 60.81%                                 | 81.36%                                 | 146,081,649                             | 115         | 82.83% | 69.42% | 26.32% |        |
| MTY68     | Spindle cell carcinoma              | No               | Fibrotic                    | 3                   | -  | -  | -    | Yes                           | 49               | 2.3             | T2       | N0       | MO      | 121.88         | LIVING   | Absent  | No             | 3                | 3             | 3.120                 | Present            | 0            | Infiltrating | irregular               | 20               | 0                       | 0                     | 0                      | 0                         | 0                      | 0                                                     | 0                                                         | 0                     | 0               | Yes          | HiSeq                   | 2000                         | 151x101                               | FFPE                                  | 138,413,256                            | 385                      | 88.12%                        | 51.84%                                 | 84.38%                                 | 150,884,289                             | 151         | 81.37% | 69.42% | 26.32% |        |
| MTY68     | Spindle cell carcinoma              | Yes              | Chondroid                   | 3                   | -  | -  | -    | Yes                           | 47               | 3.8             | T2       | N0       | MO      | 132.87         | LIVING   | Present | No             | 3                | 3             | 3.110                 | Present            | 30           | Infiltrating | none                    | 0                | 0                       | 0                     | 0                      | 0                         | 0                      | 0                                                     | 0                                                         | 0                     | 0               | Yes          | HiSeq                   | 2000                         | 7876                                  | Fusion                                | 827,837,483                            | 271                      | 91.82%                        | 68.17%                                 | 80.82%                                 | 801,260,049                             | 180         | 89.85% | 85.88% | 47.94% |        |
| MTY68     | Spindle cell carcinoma              | Yes              | Chondroid                   | 3                   | -  | -  | -    | Yes                           | 44               | 3.2             | T2       | N0       | MO      | 103.42         | LIVING   | Present | No             | 3                | 3             | 3.120                 | Present            | 0            | Papillary    | irregular               | 20               | 0                       | 0                     | 0                      | 0                         | 0                      | 0                                                     | 0                                                         | 0                     | 0               | Yes          | HiSeq                   | 2000                         | 7876                                  | Fusion                                | 426,364,814                            | 216                      | 91.93%                        | 63.21%                                 | 80.32%                                 | 139,455,512                             | 68          | 90.05% | 69.25% | 34.76% |        |
| MTY68     | Carcinoma with mesenchymal elements | Yes              | Chondroid                   | 3                   | -  | -  | -    | Yes                           | 48               | 2.3             | T2       | N0       | MO      | 49.44          | LIVING   | Present | No             | 3                | 3             | 3.150                 | Present            | 10           | Papillary    | irregular               | 20               | 20                      | 0                     | 0                      | 0                         | 0                      | 0                                                     | 0                                                         | 0                     | 0               | Yes          | HiSeq                   | 2000                         | 7876                                  | Fusion                                | 426,887,838                            | 358                      | 91.43%                        | 69.11%                                 | 84.88%                                 | 117,488,228                             | 104         | 88.45% | 74.63% | 47.44% |        |
| MTY68     | Carcinoma with mesenchymal elements | Yes              | Chondroid                   | 3                   | -  | -  | -    | Yes                           | 46               | 1.6             | T2       | N0       | MO      | 28.96          | LIVING   | Present | No             | 3                | 3             | 3.110                 | Present            | 0            | Infiltrating | none                    | 0                | 0                       | 0                     | 0                      | 0                         | 0                      | 0                                                     | 0                                                         | 0                     | 0               | Yes          | HiSeq                   | 2000                         | 7876                                  | Fusion                                | 316,511,099                            | 176                      | 91.94%                        | 69.26%                                 | 71.69%                                 | 380,174,443                             | 89          | 87.64% | 67.18% | 26.93% |        |
| MTY67     | Carcinoma with mesenchymal elements | Yes              | Chondroid                   | 3                   | -  | -  | -    | Yes                           | 60               | 2.2             | T2       | N0       | MO      | 68.12          | LIVING   | Present | No             | 3                | 3             | 3.165                 | Present            | 60           | Papillary    | irregular               | 20               | 30                      | 0                     | 0                      | 0                         | 0                      | 0                                                     | 0                                                         | 0                     | 0               | Yes          | HiSeq                   | 2000                         | 7876                                  | Fusion                                | 361,364,870                            | 243                      | 91.84%                        | 68.07%                                 | 81.62%                                 | 104,187,422                             | 84          | 81.16% | 69.89% | 33.15% |        |
| MTY71     | Carcinoma with mesenchymal elements | Yes              | Chondroid                   | 3                   | -  | -  | -    | Yes                           | 49               | 4               | T2       | N0       | MO      | 54.67          | DECEASED | Absent  | No             | 3                | 3             | 3.150                 | Present            | 0            | Infiltrating | none                    | 1                | 0                       | 0                     | 0                      | 0                         | 0                      | 0                                                     | 0                                                         | 0                     | 0               | Yes          | HiSeq                   | 2000                         | 7876                                  | Fusion                                | 273,411,844                            | 249                      | 94.41%                        | 78.99%                                 | 76.26%                                 | 174,888,880                             | 89          | 88.89% | 72.41% | 36.91% |        |
| MTY73     | Carcinoma with mesenchymal elements | Yes              | Chondroid                   | 2                   | -  | -  | -    | Yes                           | 62               | 3.5             | T2       | N0       | MO      | 2.81           | LIVING   | Present | No             | 5                | 5             | 4.171                 | Absent             | 0            | Infiltrating | irregular               | 40               | 0                       | 0                     | 0                      | 0                         | 0                      | 0                                                     | 0                                                         | 0                     | 0               | Yes          | HiSeq                   | 2000                         | 7876                                  | Fusion                                | 158,191,684                            | 138                      | 89.79%                        | 56.92%                                 | 11.82%                                 | 151,918,278                             | 69          | 88.89% | 71.25% | 38.89% |        |
| MTY73     | Carcinoma with mesenchymal elements | Yes              | Chondroid                   | 2                   | -  | -  | -    | Yes                           | 45               | 4               | T2       | N0       | MO      | 75.50          | LIVING   | Present | Yes            | 3                | 3             | 3.150                 | Absent             | 0            | Infiltrating | none                    | 1                | 20                      | 0                     | 0                      | 0                         | 0                      | 0                                                     | 0                                                         | 0                     | 0               | 0            | Yes                     | HiSeq                        | 2000                                  | 7876                                  | Fusion                                 | 273,404,144              | 231                           | 91.70%                                 | 63.41%                                 | 76.26%                                  | 158,581,421 | 84     | 88.89% | 74.81% | 36.91% |
| MTY74     | Carcinoma with mesenchymal elements | Yes              | Chondroid                   | 3                   | -  | -  | -    | Yes                           | 38               | 3.1             | T2       | N0       | MO      | 29.25          | LIVING   | Present | No             | 3                | 3             | 3.190                 | Present            | 40           | Papillary    | none                    | 5                | 15                      | 0                     | 0                      | 0                         | 0                      | 0                                                     | 0                                                         | 0                     | 0               | Yes          | HiSeq                   | 2000                         | 7876                                  | Fusion                                | 316,789,830                            | 264                      | 91.48%                        | 67.43%                                 | 78.31%                                 | 119,283,701                             | 104         | 87.79% | 74.81% | 47.13% |        |
| MTY75     | Spindle cell carcinoma              | No               | Fibrotic                    | 3                   | -  | -  | -    | Yes                           | 60               | 5               | T2       | N0       | MO      | 54.31          | LIVING   | Present | No             | 3                | 3             | 3.111                 | Absent             | 0            | Infiltrating | none                    | 5                | 0                       | 0                     | 0                      | 0                         | 0                      | 0                                                     | 0                                                         | 0                     | 0               | Yes          | HiSeq                   | 2000                         | 7876                                  | Fusion                                | 315,023,227                            | 254                      | 91.02%                        | 61.04%                                 | 78.93%                                 | 117,603,021                             | 95          | 87.44% | 74.52% | 42.90% |        |
| MTY76     | Carcinoma with squamous metaplasia  | No               | Squamous                    | 3                   | -  | -  | -    | Yes                           | 54               | 3.6             | T2       | N0       | MO      | 104.30         | DECEASED | Absent  | No             | 3                | 3             | 3.180                 | Present            | 0            | Infiltrating | none                    | 0                | 0                       |                       |                        |                           |                        |                                                       |                                                           |                       |                 |              |                         |                              |                                       |                                       |                                        |                          |                               |                                        |                                        |                                         |             |        |        |        |        |
