# Supplementary material
Source: PubMed Central journal article supplement (PMC5511565)
Supplement: NIHMS849336-supplement-8.pdf [file NIHMS849336-supplement-8.pdf]

Table with columns: METAB3, PRN4, p-Adj, RefSeq, gene, chr, pos, alt, type, path, p-value, OR, CI, cancer, mutation, and various performance metrics (Indeterminate, Sensitivity, Specificity, PPV, NPV, etc.). The table lists numerous gene mutations and their associated clinical and performance data.
