# Supplementary material
Source: PubMed Central journal article supplement (PMC5511565)
Supplement: NIHMS849336-supplement-9.pdf [file NIHMS849336-supplement-9.pdf]

Supplementary Table S3

Page 7

|          |   |    |   |    |   |    |   |    |        |                       |        |                  |
|----------|---|----|---|----|---|----|---|----|--------|-----------------------|--------|------------------|
| SOX30    | 2 | 6% | 0 | 0% | 0 | 0% | 0 | 0% | 0.1025 | Inf (0.6102-Inf)      | 1.0000 | 0 (0-Inf)        |
| SOX5     | 2 | 6% | 1 | 3% | 0 | 0% | 0 | 0% | 0.1025 | Inf (0.6102-Inf)      | 0.3235 | Inf (0.11-Inf)   |
| STAB2    | 2 | 6% | 0 | 0% | 0 | 0% | 0 | 0% | 0.1025 | Inf (0.6102-Inf)      | 1.0000 | 0 (0-Inf)        |
| TAL1     | 2 | 6% | 1 | 3% | 0 | 0% | 0 | 0% | 0.1025 | Inf (0.6102-Inf)      | 0.3235 | Inf (0.11-Inf)   |
| THSD7B   | 2 | 6% | 0 | 0% | 0 | 0% | 0 | 0% | 0.1025 | Inf (0.6102-Inf)      | 1.0000 | 0 (0-Inf)        |
| TIE1     | 2 | 6% | 1 | 3% | 0 | 0% | 0 | 0% | 0.1025 | Inf (0.6102-Inf)      | 0.3235 | Inf (0.11-Inf)   |
| TMPPRS13 | 2 | 6% | 0 | 0% | 0 | 0% | 0 | 0% | 0.1025 | Inf (0.6102-Inf)      | 1.0000 | 0 (0-Inf)        |
| TRAPPC8  | 2 | 6% | 0 | 0% | 0 | 0% | 0 | 0% | 0.1025 | Inf (0.6102-Inf)      | 1.0000 | 0 (0-Inf)        |
| TRIM10   | 2 | 6% | 1 | 3% | 0 | 0% | 0 | 0% | 0.1025 | Inf (0.6102-Inf)      | 0.3235 | Inf (0.11-Inf)   |
| TRIM33   | 2 | 6% | 2 | 6% | 0 | 0% | 0 | 0% | 0.1025 | Inf (0.6102-Inf)      | 0.1025 | Inf (0.6102-Inf) |
| TRPM1    | 2 | 6% | 0 | 0% | 0 | 0% | 0 | 0% | 0.1025 | Inf (0.6102-Inf)      | 1.0000 | 0 (0-Inf)        |
| TTC28    | 2 | 6% | 0 | 0% | 0 | 0% | 0 | 0% | 0.1025 | Inf (0.6102-Inf)      | 1.0000 | 0 (0-Inf)        |
| TTC34    | 2 | 6% | 0 | 0% | 0 | 0% | 0 | 0% | 0.1025 | Inf (0.6102-Inf)      | 1.0000 | 0 (0-Inf)        |
| UBR5     | 2 | 6% | 2 | 6% | 0 | 0% | 0 | 0% | 0.1025 | Inf (0.6102-Inf)      | 0.1025 | Inf (0.6102-Inf) |
| USP5     | 2 | 6% | 0 | 0% | 0 | 0% | 0 | 0% | 0.1025 | Inf (0.6102-Inf)      | 1.0000 | 0 (0-Inf)        |
| USP9X    | 2 | 6% | 2 | 6% | 0 | 0% | 0 | 0% | 0.1025 | Inf (0.6102-Inf)      | 0.1025 | Inf (0.6102-Inf) |
| WDR87    | 2 | 6% | 0 | 0% | 0 | 0% | 0 | 0% | 0.1025 | Inf (0.6102-Inf)      | 1.0000 | 0 (0-Inf)        |
| WNK3     | 2 | 6% | 1 | 3% | 0 | 0% | 0 | 0% | 0.1025 | Inf (0.6102-Inf)      | 0.3235 | Inf (0.11-Inf)   |
| WNT5A    | 2 | 6% | 0 | 0% | 0 | 0% | 0 | 0% | 0.1025 | Inf (0.6102-Inf)      | 1.0000 | 0 (0-Inf)        |
| ZNF180   | 2 | 6% | 0 | 0% | 0 | 0% | 0 | 0% | 0.1025 | Inf (0.6102-Inf)      | 1.0000 | 0 (0-Inf)        |
| ZNF335   | 2 | 6% | 0 | 0% | 0 | 0% | 0 | 0% | 0.1025 | Inf (0.6102-Inf)      | 1.0000 | 0 (0-Inf)        |
| ZNF585B  | 2 | 6% | 0 | 0% | 0 | 0% | 0 | 0% | 0.1025 | Inf (0.6102-Inf)      | 1.0000 | 0 (0-Inf)        |
| FLG      | 1 | 3% | 0 | 0% | 6 | 9% | 0 | 0% | 0.4233 | 0.331 (0.0141-2.449)  | 1.0000 | 0 (0-Inf)        |
| ARID1B   | 1 | 3% | 0 | 0% | 5 | 7% | 1 | 1% | 0.6610 | 0.403 (0.0167-3.199)  | 1.0000 | 0 (0-39.73)      |
| F5       | 1 | 3% | 0 | 0% | 5 | 7% | 0 | 0% | 0.6610 | 0.403 (0.0167-3.199)  | 1.0000 | 0 (0-Inf)        |
| XIRP2    | 1 | 3% | 0 | 0% | 5 | 7% | 2 | 3% | 0.6610 | 0.403 (0.0167-3.199)  | 1.0000 | 0 (0-7.281)      |
| ASXL3    | 1 | 3% | 0 | 0% | 4 | 6% | 0 | 0% | 1.0000 | 0.5108 (0.0203-4.111) | 1.0000 | 0 (0-Inf)        |
| BRCA1    | 1 | 3% | 0 | 0% | 4 | 6% | 4 | 6% | 1.0000 | 0.5108 (0.0203-4.111) | 0.3017 | 0 (0-2.311)      |
| SPTBN5   | 1 | 3% | 0 | 0% | 4 | 6% | 1 | 1% | 1.0000 | 0.5108 (0.0203-4.111) | 1.0000 | 0 (0-39.73)      |
| SSPO     | 1 | 3% | 0 | 0% | 4 | 6% | 1 | 1% | 1.0000 | 0.5108 (0.0203-4.111) | 1.0000 | 0 (0-39.73)      |
| TEP1     | 1 | 3% | 0 | 0% | 4 | 6% | 0 | 0% | 1.0000 | 0.5108 (0.0203-4.111) | 1.0000 | 0 (0-Inf)        |
| MUC16    | 0 | 0% | 0 | 0% | 6 | 9% | 0 | 0% | 0.1733 | 0 (0-1.489)           | 1.0000 | 0 (0-Inf)        |
| DNAH7    | 0 | 0% | 0 | 0% | 5 | 7% | 1 | 1% | 0.1717 | 0 (0-2.163)           | 1.0000 | 0 (0-39.73)      |
| EPS8L1   | 0 | 0% | 0 | 0% | 5 | 7% | 0 | 0% | 0.1717 | 0 (0-2.163)           | 1.0000 | 0 (0-Inf)        |
| MUC5B    | 0 | 0% | 0 | 0% | 5 | 7% | 2 | 3% | 0.1717 | 0 (0-2.163)           | 1.0000 | 0 (0-7.281)      |
| ACTN2    | 0 | 0% | 0 | 0% | 4 | 6% | 0 | 0% | 0.3017 | 0 (0-2.311)           | 1.0000 | 0 (0-Inf)        |
| ARHGEF1  | 0 | 0% | 0 | 0% | 4 | 6% | 2 | 3% | 0.3017 | 0 (0-2.311)           | 1.0000 | 0 (0-7.281)      |
| CACNA1B  | 0 | 0% | 0 | 0% | 4 | 6% | 0 | 0% | 0.3017 | 0 (0-2.311)           | 1.0000 | 0 (0-Inf)        |
| CACNA1F  | 0 | 0% | 0 | 0% | 4 | 6% | 1 | 1% | 0.3017 | 0 (0-2.311)           | 1.0000 | 0 (0-39.73)      |
| CFAP47   | 0 | 0% | 0 | 0% | 4 | 6% | 1 | 1% | 0.3017 | 0 (0-2.311)           | 1.0000 | 0 (0-39.73)      |
| KCNT2    | 0 | 0% | 0 | 0% | 4 | 6% | 1 | 1% | 0.3017 | 0 (0-2.311)           | 1.0000 | 0 (0-39.73)      |
| LRP2     | 0 | 0% | 0 | 0% | 4 | 6% | 1 | 1% | 0.3017 | 0 (0-2.311)           | 1.0000 | 0 (0-39.73)      |
| PREX1    | 0 | 0% | 0 | 0% | 4 | 6% | 0 | 0% | 0.3017 | 0 (0-2.311)           | 1.0000 | 0 (0-Inf)        |
| PTPRZ1   | 0 | 0% | 0 | 0% | 4 | 6% | 1 | 1% | 0.3017 | 0 (0-2.311)           | 1.0000 | 0 (0-39.73)      |
| SPEG     | 0 | 0% | 0 | 0% | 4 | 6% | 1 | 1% | 0.3017 | 0 (0-2.311)           | 1.0000 | 0 (0-39.73)      |
| UBR4     | 0 | 0% | 0 | 0% | 4 | 6% | 2 | 3% | 0.3017 | 0 (0-2.311)           | 1.0000 | 0 (0-7.281)      |
| ZFR      | 0 | 0% | 0 | 0% | 4 | 6% | 0 | 0% | 0.3017 | 0 (0-2.311)           | 1.0000 | 0 (0-Inf)        |
| ZNF318   | 0 | 0% | 0 | 0% | 4 | 6% | 0 | 0% | 0.3017 | 0 (0-2.311)           | 1.0000 | 0 (0-Inf)        |
