# Supplementary material
Source: PubMed Central journal article supplement (PMC5511565)
Supplement: NIHMS849336-supplement-10.pdf [file NIHMS849336-supplement-10.pdf]

|                 |         |     |     |       |       |   |   |   |   |    |   |         |          |   |
|-----------------|---------|-----|-----|-------|-------|---|---|---|---|----|---|---------|----------|---|
| <i>FKBP11</i>   | 1737773 | 214 | 55  | 25152 | 7632  | 0 | 1 | 0 | 0 | 50 | 0 | 834736  | 3.57E-02 | 1 |
| <i>C9orf47</i>  | 248480  | 646 | 4   | 22560 | 7152  | 0 | 1 | 0 | 0 | 50 | 1 | 928320  | 3.60E-02 | 1 |
| <i>ATP5J</i>    | 534575  | 641 | 29  | 14448 | 3456  | 0 | 1 | 0 | 0 | 26 | 0 | 453440  | 3.71E-02 | 1 |
| <i>AHSG</i>     | 508316  | 436 | 45  | 41392 | 12848 | 0 | 1 | 0 | 0 | 50 | 0 | 1257360 | 3.91E-02 | 1 |
| <i>MMP16</i>    | 27285   | 939 | -34 | 76640 | 20032 | 0 | 2 | 0 | 0 | 50 | 2 | 940944  | 3.96E-02 | 1 |
| <i>SOCS3</i>    | 962609  | 209 | 27  | 24752 | 7984  | 0 | 1 | 0 | 0 | 50 | 3 | 1009504 | 4.65E-02 | 1 |
| <i>FAM159B</i>  | NaN     | NaN | NaN | 18672 | 4896  | 0 | 1 | 0 | 0 | 50 | 0 | 1786720 | 4.70E-02 | 1 |
| <i>EXOSC5</i>   | 1148529 | 249 | 36  | 26560 | 8480  | 0 | 1 | 0 | 0 | 50 | 0 | 722816  | 4.74E-02 | 1 |
| <i>KRTAP5-2</i> | NaN     | NaN | NaN | 19984 | 5744  | 0 | 1 | 0 | 0 | 50 | 0 | 1787568 | 4.82E-02 | 1 |
| <i>OR5H2</i>    | 414958  | 885 | -14 | 35344 | 10016 | 0 | 1 | 0 | 0 | 50 | 0 | 833280  | 4.84E-02 | 1 |
| <i>RDM1</i>     | 703538  | 424 | 31  | 36320 | 9376  | 0 | 1 | 0 | 0 | 50 | 1 | 994336  | 4.93E-02 | 1 |

## MutSigCV analysis of metaplastic breast cancers with squamous metaplasia (n=9).

| gene           | expr    | reptime | hic | N_nonsilent | N_silent | N_noncoding | n_nonsilent | n_silent | n_noncoding | nnei | x | X      | p        | q        |
|----------------|---------|---------|-----|-------------|----------|-------------|-------------|----------|-------------|------|---|--------|----------|----------|
| <i>TP53</i>    | 2069567 | 213     | 34  | 27801       | 7677     | 0           | 7           | 0        | 0           | 50   | 0 | 466425 | 3.76E-09 | 7.09E-05 |
| <i>PTEN</i>    | 259678  | 300     | 34  | 27252       | 6336     | 0           | 4           | 0        | 0           | 50   | 0 | 461070 | 2.17E-03 | 1        |
| <i>RHOC</i>    | 559669  | 325     | 27  | 12636       | 3510     | 0           | 1           | 0        | 0           | 50   | 0 | 585513 | 2.49E-02 | 1        |
| <i>SSBP1</i>   | 200522  | 844     | 14  | 10188       | 2556     | 0           | 1           | 0        | 0           | 50   | 0 | 447156 | 2.58E-02 | 1        |
| <i>C6orf62</i> | 422850  | 362     | 40  | 15255       | 3807     | 0           | 1           | 0        | 0           | 50   | 1 | 610056 | 3.12E-02 | 1        |
| <i>CRH</i>     | 277437  | 480     | 30  | 11889       | 4176     | 0           | 1           | 0        | 0           | 50   | 1 | 501138 | 3.32E-02 | 1        |
| <i>RAB26</i>   | 1938163 | 224     | 40  | 16650       | 5031     | 0           | 1           | 0        | 0           | 50   | 0 | 537408 | 3.96E-02 | 1        |
| <i>USP5</i>    | 2822601 | 232     | 32  | 56376       | 15363    | 0           | 3           | 0        | 0           | 31   | 0 | 311337 | 4.72E-02 | 1        |

## MutSigCV analysis of metaplastic breast cancers with spindle metaplasia (n=10).

| Gene             | expr    | reptime | hic | N_nonsilent | N_silent | N_noncoding | n_nonsilent | n_silent | n_noncoding | nnei | x | X      | p        | q        |
|------------------|---------|---------|-----|-------------|----------|-------------|-------------|----------|-------------|------|---|--------|----------|----------|
| <i>TP53</i>      | 2069567 | 213     | 34  | 30890       | 8530     | 0           | 6           | 0        | 0           | 50   | 0 | 518250 | 5.28E-05 | 9.96E-01 |
| <i>TUBA1B</i>    | 2141275 | 214     | 56  | 31830       | 9210     | 0           | 2           | 0        | 0           | 50   | 0 | 657680 | 8.54E-03 | 1        |
| <i>PIK3CA</i>    | 401889  | 613     | 11  | 78940       | 19670    | 0           | 6           | 0        | 0           | 50   | 1 | 613340 | 1.21E-02 | 1        |
| <i>TSHB</i>      | 605838  | 601     | 1   | 10110       | 2670     | 0           | 2           | 0        | 0           | 50   | 0 | 698090 | 1.53E-02 | 1        |
| <i>GPX2</i>      | 521616  | 387     | 35  | 13530       | 3840     | 0           | 1           | 0        | 0           | 50   | 0 | 593990 | 2.61E-02 | 1        |
| <i>KRTAP15-1</i> | 14979   | 1035    | -68 | 9740        | 2740     | 0           | 2           | 0        | 0           | 50   | 0 | 397990 | 2.67E-02 | 1        |
| <i>ZNF740</i>    | 1729009 | 191     | 55  | 14500       | 3560     | 0           | 1           | 0        | 0           | 50   | 0 | 513560 | 3.31E-02 | 1        |
| <i>TSR2</i>      | 296262  | NaN     | 5   | 14060       | 3760     | 0           | 1           | 0        | 0           | 50   | 0 | 483040 | 3.39E-02 | 1        |
| <i>MRPL17</i>    | 424776  | 548     | 8   | 12290       | 3790     | 0           | 1           | 0        | 0           | 50   | 2 | 555890 | 3.47E-02 | 1        |
| <i>APOOL</i>     | 83775   | NaN     | -12 | 19820       | 5410     | 0           | 1           | 0        | 0           | 50   | 1 | 659740 | 3.88E-02 | 1        |
| <i>OR52K2</i>    | 264090  | 862     | -7  | 21550       | 6920     | 0           | 2           | 0        | 0           | 50   | 1 | 650610 | 4.38E-02 | 1        |
| <i>C1QTNF1</i>   | 592461  | 285     | 15  | 20230       | 5510     | 0           | 1           | 0        | 0           | 50   | 0 | 567310 | 4.48E-02 | 1        |
| <i>OR13C5</i>    | 147494  | 920     | -31 | 22170       | 6480     | 0           | 2           | 0        | 0           | 50   | 0 | 562280 | 4.48E-02 | 1        |
| <i>OR10S1</i>    | 107524  | 830     | -5  | 22620       | 7260     | 0           | 1           | 0        | 0           | 50   | 0 | 552130 | 4.96E-02 | 1        |

## Significantly mutated genes analysis of metaplastic breast cancers (n=35) using MutSigCV and the algorithm proposed by Youn and Simon.

|               | Metaplastic breast cancers (n=35) |                   | Chondroid MBCs (n=16) |                   | Spindle MBCs (n=10) |                   | Squamous MBCs (n=9) |                   |
|---------------|-----------------------------------|-------------------|-----------------------|-------------------|---------------------|-------------------|---------------------|-------------------|
|               | p-value                           | adjusted p-value* | p-value               | adjusted p-value* | p-value             | adjusted p-value* | p-value             | adjusted p-value* |
| <i>TP53</i>   | 0                                 | 0                 | 0                     | 0                 | 0                   | 0                 | 0                   | 0                 |
| <i>PIK3CA</i> | 0                                 | 0                 | NS                    | NS                | 0                   | 0                 | 0                   | 0                 |
| <i>PTEN</i>   | 0                                 | 0                 | NS                    | NS                | NS                  | NS                | 0                   | 0                 |
| <i>PIK3R1</i> | 0                                 | 0                 | NS                    | NS                | NS                  | NS                | NS                  | NS                |
| <i>CHERP</i>  | NS                                | NS                | 0.0000                | 0.0000            | NS                  | NS                | NS                  | NS                |
| <i>CD84</i>   | NS                                | NS                | 0.0001                | 0.0161            | NS                  | NS                | NS                  | NS                |
| <i>USP5</i>   | NS                                | NS                | NS                    | NS                | NS                  | NS                | 0.0001              | 0.0060            |

MBC, metaplastic breast cancer; NS, not significant. \*, correction for multiple testing by the Benjamini and Hochberg method.
