# Supplementary material
Source: PubMed Central journal article supplement (PMC5511565)
Supplement: NIHMS849336-supplement-11.pdf [file NIHMS849336-supplement-11.pdf]

Supplementary Table S5

Page 7

|         |   |    |   |    |   |    |   |    |        |             |        |             |
|---------|---|----|---|----|---|----|---|----|--------|-------------|--------|-------------|
| TRIM10  | 0 | 0% | 0 | 0% | 2 | 8% | 1 | 4% | 1.0000 | 0 (0-10.24) | 1.0000 | 0 (0-54.89) |
| TRIM33  | 0 | 0% | 0 | 0% | 2 | 8% | 2 | 8% | 1.0000 | 0 (0-10.24) | 1.0000 | 0 (0-10.24) |
| TUBA1B  | 0 | 0% | 0 | 0% | 2 | 8% | 1 | 4% | 1.0000 | 0 (0-10.24) | 1.0000 | 0 (0-54.89) |
| UBR5    | 0 | 0% | 0 | 0% | 2 | 8% | 2 | 8% | 1.0000 | 0 (0-10.24) | 1.0000 | 0 (0-10.24) |
| USP54   | 0 | 0% | 0 | 0% | 2 | 8% | 0 | 0% | 1.0000 | 0 (0-10.24) | 1.0000 | 0 (0-inf)   |
| USPL1   | 0 | 0% | 0 | 0% | 2 | 8% | 0 | 0% | 1.0000 | 0 (0-10.24) | 1.0000 | 0 (0-inf)   |
| VWA5B2  | 0 | 0% | 0 | 0% | 2 | 8% | 0 | 0% | 1.0000 | 0 (0-10.24) | 1.0000 | 0 (0-inf)   |
| WINK3   | 0 | 0% | 0 | 0% | 2 | 8% | 1 | 4% | 1.0000 | 0 (0-10.24) | 1.0000 | 0 (0-54.89) |
| WN75A   | 0 | 0% | 0 | 0% | 2 | 8% | 0 | 0% | 1.0000 | 0 (0-10.24) | 1.0000 | 0 (0-inf)   |
| ZIC4    | 0 | 0% | 0 | 0% | 2 | 8% | 0 | 0% | 1.0000 | 0 (0-10.24) | 1.0000 | 0 (0-inf)   |
| ZNF180  | 0 | 0% | 0 | 0% | 2 | 8% | 0 | 0% | 1.0000 | 0 (0-10.24) | 1.0000 | 0 (0-inf)   |
| ZNF585B | 0 | 0% | 0 | 0% | 2 | 8% | 0 | 0% | 1.0000 | 0 (0-10.24) | 1.0000 | 0 (0-inf)   |
