# Supplementary material
Source: PubMed Central journal article supplement (PMC5511565)
Supplement: NIHMS849336-supplement-12.pdf [file NIHMS849336-supplement-12.pdf]

Supplementary Table S6: Comparative analysis of the mutational frequencies in genes affecting selected functional pathways in metaplastic breast cancers and triple-negative invasive ductal carcinomas of no special type and correlations of mutational status with clinicopathologic parameters. p<0.05 are highlighted in bold. \*: Fisher's exact test. \*\*: Mann-Whitney U-test.

| List of genes for functional annotation.        |                         |                                                                                                                 |                                                                                                                                                                                                                                                                                                                                                                                                                                                                                                                                                                                                                                                                         |
|-------------------------------------------------|-------------------------|-----------------------------------------------------------------------------------------------------------------|-------------------------------------------------------------------------------------------------------------------------------------------------------------------------------------------------------------------------------------------------------------------------------------------------------------------------------------------------------------------------------------------------------------------------------------------------------------------------------------------------------------------------------------------------------------------------------------------------------------------------------------------------------------------------|
| Name                                            | Source                  | Accession                                                                                                       | Genes                                                                                                                                                                                                                                                                                                                                                                                                                                                                                                                                                                                                                                                                   |
| KEGG: PI3K/Akt/mTOR                             | KEGG                    | hsa04150 - mTOR signaling pathway<br>hsa04151 - PI3K-Akt signaling pathway<br>hsa04012 - ErbB signaling pathway | AKT1, AKT2, AKT3, CDKN1A, CDKN1B, ERBB2, ERBB3, ERBB4, FGF1, FGF2, FGF3, FGF4, GRB2, HIF1A, HRAS, IGF1R, IRS1, KIT, MTOC, NRAS, PDGFR, PDGFRB, PIK3CA, PIK3CB, PIK3R1, PRKCA, PRKCB, PRKCG, PTEN, RICTOR, RPS6KB1, RPTOR, SOS1, TSC1, TSC2                                                                                                                                                                                                                                                                                                                                                                                                                              |
| GO: PI3K signaling                              | Gene Ontology           | GO:0014065 - phosphatidylinositol 3-kinase signaling                                                            | C1QB, EDN1, ERBB2, ERBB3, GATA3, HTR2A, HTR2B, IGF1, IGF1R, IRS1, LTK, NFK1, NYAP1, NYAP2, PIK3CA, PIK3CB, PIK3C2G, PIK3CA, PIK3CB, PIK3CD, PIK3CG, PIK3R1, PIK3R2, PIK3R5, PLEKHA1, PREX2, SIRT2, TSC2, TYRO3, XBP1                                                                                                                                                                                                                                                                                                                                                                                                                                                    |
| KEGG: canonical WNT signaling                   | KEGG                    | hsa04310 - WNT signaling pathway (canonical portion)                                                            | APC, APC2, AXIN1, AXIN2, BAMBI, CCND1, CCND2, CCND3, CER1, CHD8, CREBBP, CSNK1A1, CSNK1A1L, CSNK1E, CSNK2A1, CSNK2A2, CSNK2B, CTBP1, CTBP2, CTNBB1, CTNNB1P1, CUL1, CXXC4, DKR1, DKK2, DKK4, DVL1, DVL2, DVL3, EP300, FOSL1, FRAT1, FRAT2, FZD1, FZD10, FZD2, FZD3, FZD4, FZD5, FZD6, FZD7, FZD8, FZD9, GSK3B, JUN, LEF1, LOC400927-CSNK1E, LRP5, LRP6, MMP7, MYC, NDK1, NDC2, PORCN, PPAR, RUVBL1, SENP2, SERPINF1, SFRP1, SFRP2, SFRP4, SFRP5, SMAD3, SMAD4, SOST, SOX17, TCF7, TCF7L1, TCF7L2, WIF1, WNT1, WNT10A, WNT10B, WNT11, WNT16, WNT2, WNT2B, WNT3, WNT3A, WNT4, WNT5A, WNT5B, WNT5, WNT7A, WNT7B, WNT8A, WNT8B, WNT9A, WNT9B                                |
| GO: canonical WNT signaling                     | Gene Ontology           | GO:0060070 - canonical WNT signaling pathway                                                                    | APC, AXIN1, BCL9, BCL9L, CCND1, CDC42, CDH15, CHD8, CTNNB1, DISC1, DIXDC1, DVL1, DVL1P1, DVL2, DVL3, EGF, FGF8, FZD1, FZD10, FZD2, FZD3, FZD4, FZD5, FZD7, FZD8, FZD9, GLI1, GSK3B, HOXB8, KDM6A, KLF4, LEF1, LRP5, LRP6, LRP6, LRRK2, MED12, MYC, MYH6, NDR, NKX2-5, NR4A2, OTULIN, PORCN, PRCOF1, PSEN1, PTK7, PTPFRJ, PYGO2, RARG, RYK, RYR2, SDC1, SFRP1, SHH, SMO, SNAI2, SOX17, SOX4, STK11, T, TBL1X, TBL1X1, TCF7, TCF7L1, TCF7L2, UBE2B, WNT1, WNT10B, WNT11, WNT2, WNT2B, WNT3, WNT3A, WNT4, WNT5A, WNT7A, WNT7B, WNT8A, WNT8B, WNT9A, WNT9B                                                                                                                  |
| Homologous recombination (Supplementary Fig. 4) | Curated from literature | NA                                                                                                              | ATM, ATR, ATRIP, ATRX, BABAM1, BARD1, BLM, BRCA1, BRCA2, BRCC3, BRE, BRIP1, C17orf70, C19orf40, C1orf86, CHEK1, CHEK2, DMC1, DNA2, EME1, EME2, ERCC4, EXO1, FAM175A, FAN1, FANCA, FANCB, FANCC, FANCD2, FANCF, FANCG, FANCI, FANCL, FANCLM, FIGL1, GEN1, H2AFX, HELQ, KAT5, MDC1, MRE11A, MUS81, NBN, NBN, PALB2, PASH1, PASHA, POLN, RADI1, RADI7, RADS5, RADS1, RADS1AP1, RAD51B, RAD51C, RAD51D, RAD52, RAD54L, RAD54, RBBP8, RECQL, REV1, RIF1, RMI1, RMI2, RNF168, RNF169, RNF4, RNF41, RPA2, RPA3, RTEL1, SETMAR, TOPBP1, TSG1, SFP1, SHFM1, SLX1A, SLX1B, SLX4, SMC1A, SMC3, SMC5, SMDR, TIMELESS, TIPIN, TOPBP1, TP53BP1, UIMC1, USP1, USP11, WRN, XRCC2, XRCC3 |

| Comparative analysis of the mutational frequencies of genes affecting selected functional pathways between metaplastic breast cancers and triple-negative IDC-NSTs. |                                              |                                         |                                              |                                         |                                                                                      |                                      |
|---------------------------------------------------------------------------------------------------------------------------------------------------------------------|----------------------------------------------|-----------------------------------------|----------------------------------------------|-----------------------------------------|--------------------------------------------------------------------------------------|--------------------------------------|
| Pathway                                                                                                                                                             | Metaplastic breast cancers (n=35)            |                                         | Triple-negative IDC-NSTs (n=69)              |                                         | Fisher's exact test comparing metaplastic breast cancers to triple-negative IDC-NSTs |                                      |
|                                                                                                                                                                     | Number of cases with non-synonymous mutation | % of cases with non-synonymous mutation | Number of cases with non-synonymous mutation | % of cases with non-synonymous mutation | p-value                                                                              | Odds ratio (95% confidence interval) |
| KEGG: PI3K/Akt/mTOR                                                                                                                                                 | 20                                           | 57%                                     | 15                                           | 22%                                     | <b>0.0004</b>                                                                        | 4.717 (1.827-11.79)                  |
| GO: PI3K signaling                                                                                                                                                  | 16                                           | 46%                                     | 18                                           | 26%                                     | <b>0.0500</b>                                                                        | 2.365 (1-5.736)                      |
| KEGG: canonical WNT signaling                                                                                                                                       | 12                                           | 34%                                     | 13                                           | 19%                                     | 0.0939                                                                               | 2.229 (0.8653-5.739)                 |
| GO: canonical WNT signaling                                                                                                                                         | 16                                           | 46%                                     | 18                                           | 26%                                     | <b>0.0500</b>                                                                        | 2.365 (1-5.736)                      |
| KEGG: canonical WNT signaling (including FAT1)                                                                                                                      | 14                                           | 40%                                     | 14                                           | 20%                                     | <b>0.0381</b>                                                                        | 2.593 (1.01-6.958)                   |
| GO: canonical WNT signaling (including FAT1)                                                                                                                        | 18                                           | 51%                                     | 19                                           | 28%                                     | <b>0.0189</b>                                                                        | 2.757 (1.103-6.673)                  |

| Comparative analysis of the mutational frequencies of genes affecting selected functional pathways between metaplastic breast cancers with likely pathogenic mutations and triple-negative IDC-NSTs. |                                                                    |                                            |                                                                  |                                            |                                                                                                                                                        |                                      |
|------------------------------------------------------------------------------------------------------------------------------------------------------------------------------------------------------|--------------------------------------------------------------------|--------------------------------------------|------------------------------------------------------------------|--------------------------------------------|--------------------------------------------------------------------------------------------------------------------------------------------------------|--------------------------------------|
| Pathway                                                                                                                                                                                              | Metaplastic breast cancers with likely pathogenic mutations (n=35) |                                            | Triple-negative IDC-NSTs with likely pathogenic mutations (n=69) |                                            | Fisher's exact test comparing metaplastic breast cancers with likely pathogenic mutations to triple-negative IDC-NSTs with likely pathogenic mutations |                                      |
|                                                                                                                                                                                                      | Number of cases with likely pathogenic mutation                    | % of cases with likely pathogenic mutation | Number of cases with likely pathogenic mutation                  | % of cases with likely pathogenic mutation | p-value                                                                                                                                                | Odds ratio (95% confidence interval) |
| KEGG: PI3K/Akt/mTOR                                                                                                                                                                                  | 17                                                                 | 49%                                        | 14                                                               | 20%                                        | <b>0.0058</b>                                                                                                                                          | 3.658 (1.508-9.337)                  |
| GO: PI3K signaling                                                                                                                                                                                   | 14                                                                 | 40%                                        | 13                                                               | 19%                                        | <b>0.0320</b>                                                                                                                                          | 2.84 (1.088-7.22)                    |
| KEGG: canonical WNT signaling                                                                                                                                                                        | 5                                                                  | 14%                                        | 2                                                                | 3%                                         | <b>0.0414</b>                                                                                                                                          | 5.482 (1.071-40.87)                  |
| GO: canonical WNT signaling                                                                                                                                                                          | 10                                                                 | 29%                                        | 5                                                                | 7%                                         | <b>0.0064</b>                                                                                                                                          | 5.028 (1.567-16.68)                  |
| KEGG: canonical WNT signaling (including FAT1)                                                                                                                                                       | 8                                                                  | 23%                                        | 3                                                                | 4%                                         | <b>0.0063</b>                                                                                                                                          | 6.387 (1.541-29.95)                  |
| GO: canonical WNT signaling (including FAT1)                                                                                                                                                         | 13                                                                 | 37%                                        | 6                                                                | 9%                                         | <b>0.0008</b>                                                                                                                                          | 6.077 (2.026-18.76)                  |

| Comparative analysis of the mutational frequencies of genes affecting selected functional pathways between metaplastic breast cancers of triple-negative phenotype and triple-negative IDC-NSTs. |                                                                |                                         |                                              |                                         |                                                                                                                   |                                      |
|--------------------------------------------------------------------------------------------------------------------------------------------------------------------------------------------------|----------------------------------------------------------------|-----------------------------------------|----------------------------------------------|-----------------------------------------|-------------------------------------------------------------------------------------------------------------------|--------------------------------------|
| Pathway                                                                                                                                                                                          | Metaplastic breast cancers of triple-negative phenotype (n=33) |                                         | Triple-negative IDC-NSTs (n=69)              |                                         | Fisher's exact test comparing metaplastic breast cancers of triple-negative phenotype to triple-negative IDC-NSTs |                                      |
|                                                                                                                                                                                                  | Number of cases with non-synonymous mutation                   | % of cases with non-synonymous mutation | Number of cases with non-synonymous mutation | % of cases with non-synonymous mutation | p-value                                                                                                           | Odds ratio (95% confidence interval) |
| KEGG: PI3K/Akt/mTOR                                                                                                                                                                              | 18                                                             | 55%                                     | 15                                           | 22%                                     | <b>0.0014</b>                                                                                                     | 4.249 (1.741-10.64)                  |

|                                                |    |     |    |     |               |                      |                                                                                                                                                                                                                                                                                                                                                                                                                                                                                                                             |
|------------------------------------------------|----|-----|----|-----|---------------|----------------------|-----------------------------------------------------------------------------------------------------------------------------------------------------------------------------------------------------------------------------------------------------------------------------------------------------------------------------------------------------------------------------------------------------------------------------------------------------------------------------------------------------------------------------|
| GO: PI3K signaling                             | 14 | 42% | 18 | 26% | 0.1136        | 2.072 (0.8306-5.181) | META39, PIK3C2B.p.Asp1158Val, PIK3CA.p.Glu542Lys, META57, PIK3CA.p.His1047Arg, META61, PIK3R1.p.Phe456_Gln457dup, PIK3R1.p.Leu193fs, MP1, PIK3R1.p.Ser652fs, MP15, PIK3R1.c.1746-2A-C, MP17, PIK3CA.p.His1047Arg, MP7, PIK3CA.p.His1047Arg, MTC01, PIK3CA.p.His1047Arg, MTC03, PIK3C2G.p.Glu172Gln, META57, PIK3R1.p.Tyr643Asn, TYR03.p.Gln84His, MTC12, PIK3R1.p.Asp281Val, MTC15, PIK3CA.p.His1047Arg, PIK3C2C.p.Ala676Thr, MTC16, PIK3CA.p.Cys420Arg, MTC17, PIK3CA.p.His1047Arg                                         |
| KEGG: canonical WNT signaling                  | 12 | 36% | 13 | 19% | 0.0835        | 2.438 (0.9453-6.253) | META31, EP300.p.Pro870Ser, META39, CUL1.p.Tyr50Asp, FZD7.p.Ile532Val, MYC.p.Gln52His, META40, PORCN.p.Trp305Cys, META42, LRP5.p.Pro1236Leu, META52, NKD1.p.Glu299Ala, META57, APC.p.Phe1838fs, WNT5A.p.Ala31Pro, MP11, AXIN1.p.Ser57Leu, MTC03, CHD8.p.Glu1718Lys, MTC04, CXXC4.p.Ser189Trp, MTC07, WNT5A.p.Ala167Thr, MTC17, FZD2.p.Ala473Thr                                                                                                                                                                              |
| GO: canonical WNT signaling                    | 16 | 48% | 18 | 26% | <b>0.0422</b> | 2.639 (1.101-6.654)  | META31, MYH6.p.Ala1887Val, TBL1XR1.p.Phe322Leu, META39, FZD7.p.Ile532Val, MYC.p.Gln52His, META40, PORCN.p.Trp305Cys, META42, LRP5.p.Pro1236Leu, META52, NKD1.p.Glu299Ala, META57, APC.p.Phe1838fs, WNT5A.p.Ala31Pro, MP11, AXIN1.p.Ser57Leu, MTC03, CHD8.p.Glu1718Lys, MTC06, BCL9L.p.Ile3Val, RYR2.p.Leu308Val, MTC07, LRRK2.p.Ser1036Arg, WNT5A.p.Ala167Thr, MTC13, RYR2.p.Lys3282Gln, MTC17, FZD2.p.Ala473Thr, GLI1.p.Asp87His, MTC19, DIXDC1.p.Pro401Arg                                                                |
| KEGG: canonical WNT signaling (including FAT1) | 14 | 42% | 14 | 20% | <b>0.0315</b> | 2.862 (1.095-7.362)  | META31, EP300.p.Pro870Ser, FAT1.p.Met1688Ile, META39, CUL1.p.Tyr50Asp, FZD7.p.Ile532Val, MYC.p.Gln52His, META40, PORCN.p.Trp305Cys, META42, LRP5.p.Pro1236Leu, META52, NKD1.p.Glu299Ala, META57, APC.p.Phe1838fs, WNT5A.p.Ala31Pro, MP11, AXIN1.p.Ser57Leu, MTC03, CHD8.p.Glu1718Lys, MTC04, CXXC4.p.Ser189Trp, MTC07, WNT5A.p.Ala167Thr, MTC15, FAT1.p.Val2168fs, MTC17, FAT1.p.Glu4283Gln, FZD2.p.Ala473Thr                                                                                                               |
| GO: canonical WNT signaling (including FAT1)   | 18 | 55% | 19 | 28% | <b>0.0147</b> | 3.119 (1.272-7.954)  | META31, FAT1.p.Met1688Ile, MYH6.p.Ala1887Val, TBL1XR1.p.Phe322Leu, META39, FZD7.p.Ile532Val, MYC.p.Gln52His, META40, PORCN.p.Trp305Cys, META42, LRP5.p.Pro1236Leu, META52, NKD1.p.Glu299Ala, META57, APC.p.Phe1838fs, WNT5A.p.Ala31Pro, MP11, AXIN1.p.Ser57Leu, MTC03, CHD8.p.Glu1718Lys, MTC06, BCL9L.p.Ile3Val, RYR2.p.Leu308Val, MTC07, LRRK2.p.Ser1036Arg, WNT5A.p.Ala167Thr, MTC13, RYR2.p.Lys3282Gln, MTC15, FAT1.p.Val2168fs, MTC17, FAT1.p.Glu4283Gln, FZD2.p.Ala473Thr, GLI1.p.Asp87His, MTC19, DIXDC1.p.Pro401Arg |

| Pathway                                        | Metaplastic breast cancers of triple-negative phenotype (n=33) |                                            | Triple-negative IDC-NSTs (n=69)                 |                                            | Fisher's exact test comparing metaplastic breast cancers of triple-negative phenotype to triple-negative IDC-NSTs with likely pathogenic mutations |                                      | Metaplastic breast cancers of triple-negative phenotype with likely pathogenic mutations                                                                                                                                                                                                                                                                                                                                                                |
|------------------------------------------------|----------------------------------------------------------------|--------------------------------------------|-------------------------------------------------|--------------------------------------------|----------------------------------------------------------------------------------------------------------------------------------------------------|--------------------------------------|---------------------------------------------------------------------------------------------------------------------------------------------------------------------------------------------------------------------------------------------------------------------------------------------------------------------------------------------------------------------------------------------------------------------------------------------------------|
|                                                | Number of cases with likely pathogenic mutation                | % of cases with likely pathogenic mutation | Number of cases with likely pathogenic mutation | % of cases with likely pathogenic mutation | p-value                                                                                                                                            | Odds ratio (95% confidence interval) |                                                                                                                                                                                                                                                                                                                                                                                                                                                         |
| KEGG: PI3K/Akt/mTOR                            | 15                                                             | 45%                                        | 14                                              | 20%                                        | <b>0.0108</b>                                                                                                                                      | 3.231 (1.265-8.233)                  | META39, PIK3CA.p.Glu542Lys, META57, PIK3CA.p.His1047Arg, META61, PIK3R1.p.Leu193fs, PIK3R1.p.Phe456_Gln457dup, MP1, PIK3R1.p.Leu193fs, MP1, PIK3R1.c.1746-2A-C, MP17, PIK3CA.p.His1047Arg, MTC12, PTEN.p.Leu112Gln, PIK3R1.p.Asp281Val, MTC13, ERBB4.p.Met322Ile, MTC14, PTEN.p.Asp268Glu, MTC15, PIK3CA.p.His1047Arg, MTC16, PTEN.c.1027-1G>A, PTEN.c.209+2T>C, PIK3CA.p.Cys420Arg, MTC17, PIK3CA.p.His1047Arg, MTC20, PTEN.c.209+1_209+4delGTAA       |
| GO: PI3K signaling                             | 12                                                             | 36%                                        | 13                                              | 19%                                        | 0.0835                                                                                                                                             | 2.438 (0.9453-6.253)                 | META39, PIK3CA.p.Glu542Lys, PIK3C2B.p.Asp1158Val, META57, PIK3CA.p.His1047Arg, META61, PIK3R1.p.Leu193fs, PIK3R1.p.Phe456_Gln457dup, MP1, PIK3R1.p.Ser652fs, MP15, PIK3R1.c.1746-2A-C, MP17, PIK3CA.p.His1047Arg, MP7, PIK3CA.p.His1047Arg, MTC01, PIK3C2G.p.Glu172Gln, META57, PIK3R1.p.Tyr643Asn, TYR03.p.Gln84His, MTC12, PIK3R1.p.Asp281Val, MTC15, PIK3CA.p.His1047Arg, PIK3C2C.p.Ala676Thr, MTC16, PIK3CA.p.Cys420Arg, MTC17, PIK3CA.p.His1047Arg |
| KEGG: canonical WNT signaling                  | 5                                                              | 15%                                        | 2                                               | 3%                                         | 0.0345                                                                                                                                             | 5.865 (1.141-43.83)                  | META31, EP300.p.Pro870Ser, META57, APC.p.Phe1838fs, MP11, AXIN1.p.Ser359Arg, MTC01, AXIN1.p.Ser57Leu, MTC03, CHD8.p.Glu1718Lys                                                                                                                                                                                                                                                                                                                          |
| GO: canonical WNT signaling                    | 10                                                             | 30%                                        | 5                                               | 7%                                         | <b>0.0051</b>                                                                                                                                      | 5.456 (1.697-18.2)                   | META31, TBL1XR1.p.Phe322Leu, META42, SMO.p.Pro560Ala, META52, LRRK2.p.Val1903Glu, META57, APC.p.Phe1838fs, MP1, KDM6A.p.Arg57fs, MED12.p.Gln415Lys, MP11, AXIN1.p.Ser359Arg, MP18, KDM6A.p.Ile1022fs, MTC01, AXIN1.p.Ser57Leu, MTC03, CHD8.p.Glu1718Lys, MTC19, DIXDC1.p.Pro401Arg                                                                                                                                                                      |
| KEGG: canonical WNT signaling (including FAT1) | 8                                                              | 24%                                        | 3                                               | 4%                                         | <b>0.0046</b>                                                                                                                                      | 6.885 (1.663-32.41)                  | META31, FAT1.p.Met1688Ile, EP300.p.Pro870Ser, META57, APC.p.Phe1838fs, MP11, AXIN1.p.Ser359Arg, MP15, FAT1.p.Ser1566Phe, MTC01, AXIN1.p.Ser57Leu, MTC03, CHD8.p.Glu1718Lys, MTC15, FAT1.p.Val2168fs, MTC17, FAT1.p.Glu4283Gln                                                                                                                                                                                                                           |
| GO: canonical WNT signaling (including FAT1)   | 13                                                             | 39%                                        | 6                                               | 9%                                         | <b>0.0006</b>                                                                                                                                      | 6.67 (2.192-20.92)                   | META31, FAT1.p.Met1688Ile, TBL1XR1.p.Phe322Leu, META42, SMO.p.Pro560Ala, META52, LRRK2.p.Val1903Glu, META57, APC.p.Phe1838fs, MP1, KDM6A.p.Arg57fs, MED12.p.Gln415Lys, MP11, AXIN1.p.Ser359Arg, MP15, FAT1.p.Ser1566Phe, MP18, KDM6A.p.Ile1022fs, MTC01, AXIN1.p.Ser57Leu, MTC03, CHD8.p.Glu1718Lys, MTC15, FAT1.p.Val2168fs, MTC17, FAT1.p.Glu4283Gln, MTC19, DIXDC1.p.Pro401Arg                                                                       |

| Comparative analysis of the mutational frequency of genes affecting selected functional pathways between metaplastic breast cancers with different histologic features. |                                                             |                                         |                                                           |                                         |                                                          |                                         |                                                                                             |                                                                                                                                                                                                                                                                                                  |                                                                                                                                                                                                                                                                                                   |                                                                                                                                                                                                                              |
|-------------------------------------------------------------------------------------------------------------------------------------------------------------------------|-------------------------------------------------------------|-----------------------------------------|-----------------------------------------------------------|-----------------------------------------|----------------------------------------------------------|-----------------------------------------|---------------------------------------------------------------------------------------------|--------------------------------------------------------------------------------------------------------------------------------------------------------------------------------------------------------------------------------------------------------------------------------------------------|---------------------------------------------------------------------------------------------------------------------------------------------------------------------------------------------------------------------------------------------------------------------------------------------------|------------------------------------------------------------------------------------------------------------------------------------------------------------------------------------------------------------------------------|
| Pathway                                                                                                                                                                 | Metaplastic breast cancers with chondroid metaplasia (n=16) |                                         | Metaplastic breast cancers with spindle metaplasia (n=10) |                                         | Metaplastic breast cancer with squamous metaplasia (n=9) |                                         | Fisher's exact test comparing metaplastic breast cancers with different histologic features | Metaplastic breast cancers with chondroid metaplasia with non-synonymous mutations                                                                                                                                                                                                               | Metaplastic breast cancers with spindle metaplasia with non-synonymous mutations                                                                                                                                                                                                                  | Metaplastic breast cancers with squamous metaplasia with non-synonymous mutations                                                                                                                                            |
|                                                                                                                                                                         | Number of cases with non-synonymous mutation                | % of cases with non-synonymous mutation | Number of cases with non-synonymous mutation              | % of cases with non-synonymous mutation | Number of cases with non-synonymous mutation             | % of cases with non-synonymous mutation | p-value                                                                                     |                                                                                                                                                                                                                                                                                                  |                                                                                                                                                                                                                                                                                                   |                                                                                                                                                                                                                              |
| KEGG: PI3K/Akt/mTOR                                                                                                                                                     | 7                                                           | 44%                                     | 7                                                         | 70%                                     | 6                                                        | 67%                                     | 0.3479                                                                                      | META52, KIT.p.Glu198Gly, MP1, PIK3R1.p.Ser652fs, MP15, PIK3R1.c.1746-2A-C, RPTOR.p.Asp86Gly, MTC06, IGF1R.p.Tyr643Asn, MTC11, RPS8K81.p.Glu454Asp, MTC13, ERBB4.p.Met322Ile, MTC14, PTEN.p.Asp268Glu                                                                                             | META39, PIK3CA.p.Glu542Lys, META57, PIK3CA.p.His1047Arg, META61, PIK3R1.p.Phe456_Gln457dup, PIK3R1.p.Leu193fs, MP17, PIK3CA.p.His1047Arg, MP7, PIK3CA.p.His1047Arg, MTC01, PIK3CA.p.His1047Arg, MTC15, PIK3CA.p.His1047Arg                                                                        | MTC12, PIK3R1.p.Asp281Val, PTEN.p.Leu112Gln, MTC16, PIK3CA.p.Cys420Arg, PTEN.c.209+2T>C, PTEN.c.1027-1G>A, MTC17, PIK3CA.p.His1047Arg, MP7, PIK3CA.p.His1047Arg, MTC20, PTEN.c.209+1_209+4delGTAA, MTC23, PIK3CA.p.Glu542Lys |
| GO: PI3K signaling                                                                                                                                                      | 3                                                           | 19%                                     | 8                                                         | 80%                                     | 5                                                        | 56%                                     | <b>0.0065</b>                                                                               | MP1, PIK3R1.p.Ser652fs, MP15, PIK3R1.c.1746-2A-C, MTC06, IGF1R.p.Tyr643Asn, TYR03.p.Gln84His                                                                                                                                                                                                     | META39, PIK3C2B.p.Asp1158Val, PIK3CA.p.Glu542Lys, META57, PIK3CA.p.His1047Arg, META61, PIK3R1.p.Phe456_Gln457dup, PIK3R1.p.Leu193fs, MP17, PIK3CA.p.His1047Arg, MP7, PIK3CA.p.His1047Arg, MTC01, PIK3CA.p.His1047Arg, MTC03, PIK3C2G.p.Glu172Gln, MTC15, PIK3CA.p.His1047Arg, PIK3C2C.p.Ala676Thr | MTC12, PIK3R1.p.Asp281Val, MTC16, PIK3CA.p.Cys420Arg, MTC17, PIK3CA.p.His1047Arg, MTC18, PIK3CA.p.Gln72Lys, PIK3CA.p.His1047Arg, MTC23, PIK3CA.p.Glu542Lys                                                                   |
| KEGG: canonical WNT signaling                                                                                                                                           | 4                                                           | 25%                                     | 4                                                         | 40%                                     | 4                                                        | 44%                                     | 0.6000                                                                                      | META31, EP300.p.Pro870Ser, META52, NKD1.p.Glu299Ala, MTC04, CXXC4.p.Ser189Trp, MTC07, WNT5A.p.Ala167Thr                                                                                                                                                                                          | META39, CUL1.p.Tyr50Asp, FZD7.p.Ile532Val, MYC.p.Gln52His, META57, APC.p.Phe1838fs, WNT5A.p.Ala31Pro, MTC01, AXIN1.p.Ser57Leu, MTC03, CHD8.p.Glu1718Lys                                                                                                                                           | META40, PORCN.p.Trp305Cys, META42, LRP5.p.Pro1236Leu, MP11, AXIN1.p.Ser359Arg, MTC17, FZD2.p.Ala473Thr                                                                                                                       |
| GO: canonical WNT signaling                                                                                                                                             | 8                                                           | 50%                                     | 4                                                         | 40%                                     | 4                                                        | 44%                                     | 0.9105                                                                                      | META31, MYH6.p.Ala1887Val, TBL1XR1.p.Phe322Leu, META52, LRRK2.p.Val1903Glu, MP1, KDM6A.p.Arg57fs, MP18, BCL9L.p.Ile1022fs, MTC06, KDM6A.p.Ile1022fs, MTC06, BCL9L.p.Ile3Val, RYR2.p.Leu308Val, MTC07, LRRK2.p.Ser1036Arg, WNT5A.p.Ala167Thr, MTC13, RYR2.p.Lys3282Gln, MTC19, DIXDC1.p.Pro401Arg | META39, FZD7.p.Ile532Val, MYC.p.Gln52His, META57, APC.p.Phe1838fs, WNT5A.p.Ala31Pro, MTC01, AXIN1.p.Ser57Leu, MTC03, CHD8.p.Glu1718Lys                                                                                                                                                            | META40, PORCN.p.Trp305Cys, META42, LRP5.p.Pro1236Leu, SMO.p.Pro560Ala, MP11, AXIN1.p.Ser359Arg, MTC17, FZD2.p.Ala473Thr, GLI1.p.Asp87His                                                                                     |

|                                                |   |     |   |     |   |     |        |                                                                                                                                                                                                                                                                                                                                                            |                                                                                                                                                                                  |                                                                                                                                                              |
|------------------------------------------------|---|-----|---|-----|---|-----|--------|------------------------------------------------------------------------------------------------------------------------------------------------------------------------------------------------------------------------------------------------------------------------------------------------------------------------------------------------------------|----------------------------------------------------------------------------------------------------------------------------------------------------------------------------------|--------------------------------------------------------------------------------------------------------------------------------------------------------------|
| KEGG: canonical WNT signaling (including FAT1) | 5 | 31% | 5 | 50% | 4 | 44% | 0.6741 | META31, EP300.p.Pro870Ser, FAT1.p.Met1688Ile, META52, NCO1.p.Glu299Ala, MP15, FAT1.p.Ser1566Phe, MTC04, CXCKC4.p.Ser189Trp, MTC07, WNT5A.p.Ala167Thr                                                                                                                                                                                                       | META39, CUL1.p.Tyr50Asp, FZD7.p.Ile532Val, MYC.p.Gln52His, META57, APC.p.Phe1838fs, WNT5A.p.Ala31Pro, MTC01, AXIN1.p.Ser57Leu, MTC03, CHD8.p.Glu1718Lys, MTC15, FAT1.p.Val2168fs | META40, PORCN.p.Trp305Cys, META42, LRP5.p.Pro1238Leu, MP11, AXIN1.p.Ser359Arg, MTC17, FAT1.p.Glu4283Gln, FZD2.p.Ala473Thr                                    |
| GO: canonical WNT signaling (including FAT1)   | 9 | 56% | 5 | 50% | 4 | 44% | 0.9099 | META31, FAT1.p.Met1688Ile, MYH6.p.Ala1887Val, TBL1XR1.p.Phe322Leu, META52, LRRK2.p.Val1903Glu, MP1, KDM6A.p.Arg571fs, MED12.p.Gln415Lys, MP15, FAT1.p.Ser1566Phe, MP18, BCL9L.p.Phe1498Leu, KDM6A.p.Ile1022fs, MTC06, BCL9L.p.Ile9Val, RYR2.p.Leu308Val, MTC07, LRRK2.p.Ser1098Arg, WNT5A.p.Ala167Thr, MTC13, RYR2.p.Lys3282Gln, MTC19, DDXDC1.p.Pro401Arg | META39, FZD7.p.Ile532Val, MYC.p.Gln52His, META57, APC.p.Phe1838fs, WNT5A.p.Ala31Pro, MTC01, AXIN1.p.Ser57Leu, MTC03, CHD8.p.Glu1718Lys, MTC15, FAT1.p.Val2168fs                  | META40, PORCN.p.Trp305Cys, META42, LRP5.p.Pro1238Leu, SMO.p.Pro560Ala, MP11, AXIN1.p.Ser359Arg, MTC17, FAT1.p.Glu4283Gln, FZD2.p.Ala473Thr, GLI1.p.Asp871His |

| Pathway                                        | Metaplastic breast cancers with chondroid metaplasia (n=16) |                                            | Metaplastic breast cancers with spindle metaplasia (n=10) |                                            | Metaplastic breast cancer with squamous metaplasia (n=9) |                                            | Fisher's exact test comparing metaplastic breast cancers with different histologic features with likely pathogenic mutations | Metaplastic breast cancers with chondroid metaplasia with likely pathogenic mutations                                                                                                             | Metaplastic breast cancers with spindle metaplasia with likely pathogenic mutations                                                                                                                                                                                  | Metaplastic breast cancers with squamous metaplasia with likely pathogenic mutations                                                                                                                                         |
|------------------------------------------------|-------------------------------------------------------------|--------------------------------------------|-----------------------------------------------------------|--------------------------------------------|----------------------------------------------------------|--------------------------------------------|------------------------------------------------------------------------------------------------------------------------------|---------------------------------------------------------------------------------------------------------------------------------------------------------------------------------------------------|----------------------------------------------------------------------------------------------------------------------------------------------------------------------------------------------------------------------------------------------------------------------|------------------------------------------------------------------------------------------------------------------------------------------------------------------------------------------------------------------------------|
|                                                | Number of cases with likely pathogenic mutation             | % of cases with likely pathogenic mutation | Number of cases with likely pathogenic mutation           | % of cases with likely pathogenic mutation | Number of cases with likely pathogenic mutation          | % of cases with likely pathogenic mutation |                                                                                                                              |                                                                                                                                                                                                   |                                                                                                                                                                                                                                                                      |                                                                                                                                                                                                                              |
| KEGG: PI3K/Akt/mTOR                            | 4                                                           | 25%                                        | 7                                                         | 70%                                        | 6                                                        | 67%                                        | <b>0.0383</b>                                                                                                                | MP1, PIK3R1.p.Ser652fs, MP15, PIK3R1.c.1746-2A>C, MTC13, ERBB4.p.Met322Ile, MTC14, PTEN.p.Asp268Glu                                                                                               | META39, PIK3CA.p.Glu542Lys, META57, PIK3CA.p.His1047Arg, META61, PIK3R1.p.Leu193fs, PIK3R1.p.Phe456_Gln457dup, MP17, PIK3CA.p.His1047Arg, MP7, PIK3CA.p.His1047Arg, MTC01, PIK3CA.p.His1047Arg, MTC15, PIK3CA.p.His1047Arg                                           | MTC12, PTEN.p.Leu112Gln, PIK3R1.p.Asp281Val, MTC16, PTEN.c.1027-1G>A, PTEN.c.209+2T>C, PIK3CA.p.Cys420Arg, MTC17, PIK3CA.p.His1047Leu, MTC18, PIK3CA.p.His1047Arg, MTC20, PTEN.c.209+1_209+delGTA, MTC23, PIK3CA.p.Glu542Lys |
| GO: PI3K signalling                            | 2                                                           | 13%                                        | 7                                                         | 70%                                        | 5                                                        | 56%                                        | <b>0.0088</b>                                                                                                                | MP1, PIK3R1.p.Ser652fs, MP15, PIK3R1.c.1746-2A>C                                                                                                                                                  | META39, PIK3CA.p.Glu542Lys, PIK3C2B.p.Asp1158Val, META57, PIK3CA.p.His1047Arg, META61, PIK3R1.p.Leu193fs, PIK3R1.p.Phe456_Gln457dup, MP17, PIK3CA.p.His1047Arg, MP7, PIK3CA.p.His1047Arg, MTC01, PIK3CA.p.His1047Arg, MTC15, PIK3CA.p.His1047Arg, PIK3CG.p.Ala676Thr | MTC12, PIK3R1.p.Asp281Val, MTC16, PIK3CA.p.Cys420Arg, MTC17, PIK3CA.p.His1047Leu, MTC18, PIK3CA.p.His1047Arg, MTC20, PIK3CA.p.Glu542Lys                                                                                      |
| KEGG: canonical WNT signaling                  | 1                                                           | 6%                                         | 3                                                         | 30%                                        | 1                                                        | 11%                                        | 0.2863                                                                                                                       | META31, EP300.p.Pro870Ser                                                                                                                                                                         | META57, APC.p.Phe1838fs, MTC01, AXIN1.p.Ser57Leu, MTC03, CHD8.p.Glu1718Lys                                                                                                                                                                                           | MP11, AXIN1.p.Ser359Arg                                                                                                                                                                                                      |
| GO: canonical WNT signaling                    | 5                                                           | 31%                                        | 3                                                         | 30%                                        | 2                                                        | 22%                                        | 1.0000                                                                                                                       | META31, TBL1XR1.p.Phe322Leu, META52, LRRK2.p.Val1903Glu, MP1, KDM6A.p.Arg571fs, MED12.p.Gln415Lys, MP18, KDM6A.p.Ile1022fs, MTC19, DDXDC1.p.Pro401Arg                                             | META57, APC.p.Phe1838fs, MTC01, AXIN1.p.Ser57Leu, MTC03, CHD8.p.Glu1718Lys                                                                                                                                                                                           | META42, SMO.p.Pro560Ala, MP11, AXIN1.p.Ser359Arg                                                                                                                                                                             |
| KEGG: canonical WNT signaling (including FAT1) | 2                                                           | 13%                                        | 4                                                         | 40%                                        | 2                                                        | 22%                                        | 0.2952                                                                                                                       | META31, FAT1.p.Met1688Ile, EP300.p.Pro870Ser, MP15, FAT1.p.Ser1566Phe                                                                                                                             | META57, APC.p.Phe1838fs, MTC01, AXIN1.p.Ser57Leu, MTC03, CHD8.p.Glu1718Lys, FAT1.p.Val2168fs                                                                                                                                                                         | MP11, AXIN1.p.Ser359Arg, MTC17, FAT1.p.Glu4283Gln                                                                                                                                                                            |
| GO: canonical WNT signaling (including FAT1)   | 6                                                           | 38%                                        | 4                                                         | 40%                                        | 3                                                        | 33%                                        | 1.0000                                                                                                                       | META31, FAT1.p.Met1688Ile, TBL1XR1.p.Phe322Leu, META52, LRRK2.p.Val1903Glu, MP1, KDM6A.p.Arg571fs, MED12.p.Gln415Lys, MP15, FAT1.p.Ser1566Phe, MP18, KDM6A.p.Ile1022fs, MTC19, DDXDC1.p.Pro401Arg | META57, APC.p.Phe1838fs, MTC01, AXIN1.p.Ser57Leu, MTC03, CHD8.p.Glu1718Lys, MTC15, FAT1.p.Val2168fs                                                                                                                                                                  | META42, SMO.p.Pro560Ala, MP11, AXIN1.p.Ser359Arg, MTC17, FAT1.p.Glu4283Gln                                                                                                                                                   |

Comparative analysis of clinical and molecular features between MBCs and IDC-NSTs with and without mutations in the PI3K/AKT/mTOR and WNT pathways

|                                       | No non-synonymous mutation in PI3K/AKT/mTOR (MBC) | Non-synonymous mutation in PI3K/AKT/mTOR (MBC) | No non-synonymous mutation in PI3K/AKT/mTOR (triple-negative IDC-NST) | Non-synonymous mutation in PI3K/AKT/mTOR (triple-negative IDC-NST) | P-value between MBCs with and without non-synonymous mutation in PI3K/AKT/mTOR | P-value between triple-negative IDC-NSTs with and without non-synonymous mutation in PI3K/AKT/mTOR | P-value between MBCs and triple-negative with non-synonymous mutation in PI3K/AKT/mTOR | P-value between MBCs and triple-negative without non-synonymous mutation in PI3K/AKT/mTOR |
|---------------------------------------|---------------------------------------------------|------------------------------------------------|-----------------------------------------------------------------------|--------------------------------------------------------------------|--------------------------------------------------------------------------------|----------------------------------------------------------------------------------------------------|----------------------------------------------------------------------------------------|-------------------------------------------------------------------------------------------|
| pT stage*                             | T1                                                | 5                                              | 3                                                                     | 14                                                                 | 2                                                                              | 0.2152                                                                                             | 0.4994                                                                                 | 0.3894                                                                                    |
|                                       | T2                                                | 9                                              | 12                                                                    | 33                                                                 | 11                                                                             |                                                                                                    |                                                                                        |                                                                                           |
|                                       | T3                                                | 1                                              | 5                                                                     | 5                                                                  | 1                                                                              |                                                                                                    |                                                                                        |                                                                                           |
|                                       | T4                                                | 0                                              | 0                                                                     | 1                                                                  | 1                                                                              |                                                                                                    |                                                                                        |                                                                                           |
|                                       | N0                                                | 14                                             | 14                                                                    | 35                                                                 | 9                                                                              |                                                                                                    |                                                                                        |                                                                                           |
| pN stage*                             | N1                                                | 1                                              | 2                                                                     | 14                                                                 | 3                                                                              | 0.6128                                                                                             | 0.5396                                                                                 | 0.7680                                                                                    |
|                                       | N2                                                | 0                                              | 1                                                                     | 3                                                                  | 2                                                                              |                                                                                                    |                                                                                        |                                                                                           |
|                                       | N3                                                | 0                                              | 2                                                                     | 2                                                                  | 1                                                                              |                                                                                                    |                                                                                        |                                                                                           |
| N stage*                              | M0                                                | 14                                             | 15                                                                    | 53                                                                 | 15                                                                             | 0.2072                                                                                             | 1.0000                                                                                 | 0.0570                                                                                    |
|                                       | M1                                                | 1                                              | 5                                                                     | 1                                                                  | 0                                                                              |                                                                                                    |                                                                                        |                                                                                           |
| Age at diagnosis (median and range)** | 48 (34-64)                                        | 60.5 (35-82)                                   | 51.5 (29-82)                                                          | 52 (26-82)                                                         | <b>0.0048</b>                                                                  | 0.4491                                                                                             | 0.2496                                                                                 | 0.2655                                                                                    |
| Tumor size (cm, median and range)**   | 2.25 (1.1-3.2)                                    | 3.55 (1-14)                                    | NA                                                                    | NA                                                                 | 0.0858                                                                         | NA                                                                                                 | NA                                                                                     | NA                                                                                        |

|           | No likely pathogenic mutation in PI3K/AKT/mTOR (MBC) | Likely pathogenic mutation in PI3K/AKT/mTOR (MBC) | No likely pathogenic mutation in PI3K/AKT/mTOR (triple-negative IDC-NST) | Likely pathogenic mutation in PI3K/AKT/mTOR (triple-negative IDC-NST) | P-value between MBCs with and without likely pathogenic mutation in PI3K/AKT/mTOR | P-value between triple-negative IDC-NSTs with and without likely pathogenic mutation in PI3K/AKT/mTOR | P-value between MBCs and triple-negative with likely pathogenic mutation in PI3K/AKT/mTOR | P-value between MBCs and triple-negative without likely pathogenic mutation in PI3K/AKT/mTOR |
|-----------|------------------------------------------------------|---------------------------------------------------|--------------------------------------------------------------------------|-----------------------------------------------------------------------|-----------------------------------------------------------------------------------|-------------------------------------------------------------------------------------------------------|-------------------------------------------------------------------------------------------|----------------------------------------------------------------------------------------------|
| pT stage* | T1                                                   | 6                                                 | 2                                                                        | 15                                                                    | 1                                                                                 | 0.1102                                                                                                | 0.2012                                                                                    | 0.3396                                                                                       |
|           | T2                                                   | 11                                                | 10                                                                       | 33                                                                    | 11                                                                                |                                                                                                       |                                                                                           |                                                                                              |
|           | T3                                                   | 1                                                 | 5                                                                        | 5                                                                     | 1                                                                                 |                                                                                                       |                                                                                           |                                                                                              |
|           | T4                                                   | 0                                                 | 0                                                                        | 1                                                                     | 1                                                                                 |                                                                                                       |                                                                                           |                                                                                              |
|           | N0                                                   | 16                                                | 12                                                                       | 36                                                                    | 8                                                                                 |                                                                                                       |                                                                                           |                                                                                              |
| pN stage* | N1                                                   | 1                                                 | 2                                                                        | 14                                                                    | 3                                                                                 | 0.6860                                                                                                | 0.4770                                                                                    | 0.7863                                                                                       |
|           | N2                                                   | 0                                                 | 1                                                                        | 3                                                                     | 2                                                                                 |                                                                                                       |                                                                                           |                                                                                              |
